# Supplementary material
Source: publisher site journal article supplement (https://www.kjim.org/upload/media/kjim-2023-523-Supplementary-Fig-2.pdf)
Supplement: Supplementary file 1 [file kjim-2023-523-Supplementary-Fig-2.pdf]

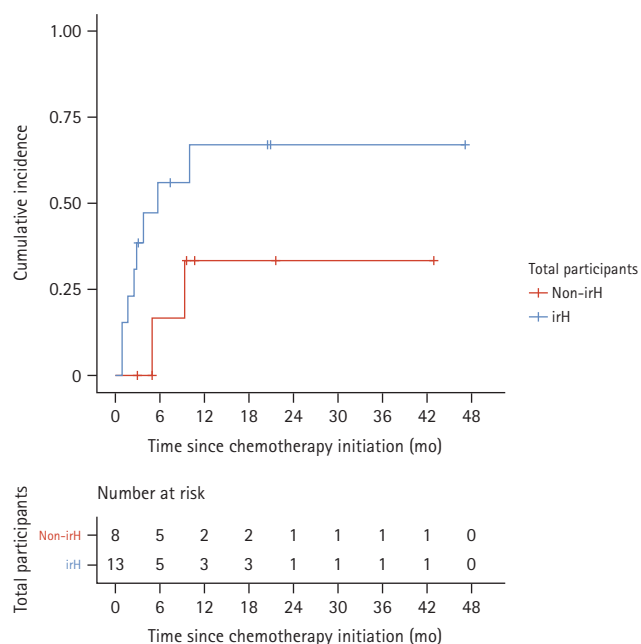

**Supplementary Figure 2.** Kaplan–Meier plot depicting the cumulative incidence of events with levothyroxine replacement over time after the initiation of the immune checkpoint inhibitor therapy (immune-related hypophysitis group vs. non-immune-related hypophysitis group). TSH, thyroid-stimulating hormone; T4, thyroxine.
